# Supplementary material for: Importance of Bark Physicochemical Properties in an Epiphytic Bryophyte Community within a Temperate Deciduous Broadleaf Forest
Source: MDPI journal article supplement (doi:10.3390/d15050688), 2023-05-19
Supplement: s1 [file s1]

**Table S1. The PCA first four axis of bark physicochemical properties variables**

| Species                                        | PC1          | PC2          | PC3          | PC4          |
|------------------------------------------------|--------------|--------------|--------------|--------------|
| <i>Betula platyphylla</i>                      | -1.523585773 | -1.760468139 | 0.173463844  | 0.819858717  |
| <i>Symplocos paniculata</i>                    | 4.250874499  | 0.662278341  | -0.280147844 | 2.035298117  |
| <i>Bothrocaryum controversa</i>                | 0.051045883  | -0.14501691  | -0.646724009 | 0.047073039  |
| <i>Carpinus turczaninowii</i>                  | -0.10328443  | -1.151263675 | -2.369782052 | -1.214615181 |
| <i>Malus honanensis</i>                        | -0.233916268 | -0.524495901 | -0.253770982 | -0.692659656 |
| <i>Tilia japonica</i>                          | 0.794914653  | -0.893965407 | 2.264714361  | -0.884166938 |
| <i>Pinus armandii</i>                          | -1.656064518 | -1.069410646 | -0.331374606 | 0.085262021  |
| <i>Viburnum betulifolium</i>                   | -1.522082957 | -0.251487747 | 0.232128233  | 0.074773517  |
| <i>Celastrus orbiculatus</i>                   | -0.97711668  | 0.82995478   | 0.174961202  | 0.410937621  |
| <i>Meliosma veitchiorum</i>                    | 1.5938138    | 3.96712298   | 0.382477208  | -1.743764871 |
| <i>Toxicodendron vernicifluum</i>              | 0.233681087  | -0.173331905 | 0.460988616  | -0.784518359 |
| <i>Carpinus cordata</i>                        | -0.076354971 | -0.689940137 | 0.926282643  | -0.229470389 |
| <i>Litsea tsinlingensis</i>                    | 3.42280543   | -0.630191777 | -0.27184309  | 2.108594572  |
| <i>Quercus aliena</i> var. <i>acutiserrata</i> | -0.60837963  | 0.881998339  | -0.655649653 | 0.632845469  |
| <i>Lindera obtusiloba</i>                      | -0.204227108 | -1.288286101 | -0.216008117 | 0.402574469  |
| <i>Tilia paucicostata</i>                      | 1.336053887  | 1.049250592  | -0.718359753 | -0.882489021 |
| <i>Quercus variabilis</i>                      | -1.431107259 | 0.523032401  | 0.692015283  | 0.399401917  |
| <i>Sorbus alnifolia</i>                        | -0.798466729 | -0.540610091 | -1.751605225 | -0.499006279 |
| <i>Cornus kousa</i> subsp. <i>chinensis</i>    | 0.229747066  | -0.335136108 | -1.339737303 | -0.817185053 |
| <i>Prunus clarofolia</i>                       | 1.471117898  | -1.816456725 | 2.211997937  | -1.253910094 |
| <i>Juglans cathayensis</i>                     | -2.666978999 | 1.275483215  | 0.835867312  | 1.202120555  |
| <i>Pinus tabuliformis</i>                      | -2.955774037 | 1.482250191  | 0.537725827  | 1.085439074  |
| <i>Styrax obassis</i>                          | 1.720457012  | -0.296696371 | 0.292125072  | -0.214860337 |
| <i>Corylus heterophylla</i>                    | -0.347171857 | 0.8953868    | -0.349744906 | -0.08753291  |

**Table S2. List of epiphytic bryophytes and woody plants species in the plot**

| Epiphytic Bryophytes<br>Species    | Abundanc<br>e | Abbreviation | Woody Plant Species                            | Abundanc<br>e | Abbreviatio<br>n |
|------------------------------------|---------------|--------------|------------------------------------------------|---------------|------------------|
| <i>Pylaisiadelpha yokohamae</i>    | 353           | PYY          | <i>Quercus aliena</i> var. <i>acuteserrata</i> | 697           | QUA              |
| <i>Eurohypnum leptothallum</i>     | 216           | EUE          | <i>Pinus armandii</i>                          | 151           | PIA              |
| <i>Pylaisiadelpha tenuirostris</i> | 171           | PYT          | <i>Toxicodendron vernicifluum</i>              | 103           | TOV              |
| <i>Gammiella panchienii</i>        | 116           | GAP          | <i>Betula platyphylla</i>                      | 56            | BEP              |
| <i>Eurhynchium latifolium</i>      | 107           | EUL          | <i>Lindera obtusiloba</i>                      | 49            | LIO              |
| <i>Frullania sinensis</i>          | 107           | FRS          | <i>Litsea tsinlingensis</i>                    | 41            | LIT              |
| <i>Entodon macropodus</i>          | 105           | ENM          | <i>Cornus kousa</i> subsp. <i>chinensis</i>    | 28            | COK              |
| <i>Haplohymenium triste</i>        | 73            | HAT          | <i>Corylus heterophylla</i>                    | 28            | COH              |
| <i>Heteroscyphus argutus</i>       | 71            | HEA          | <i>Symplocos paniculata</i>                    | 28            | SYN              |
| <i>Schwetschkeopsis fabronia</i>   | 46            | SCF          | <i>Carpinus turczaninowii</i>                  | 24            | CAT              |
| <i>Brachythecium rivulare</i>      | 46            | BRR          | <i>Tilia paucicostata</i>                      | 24            | TIP              |
| <i>Frullania ericoides</i>         | 42            | FRE          | <i>Sorbus alnifolia</i>                        | 14            | SOA              |
| <i>Pylaisiopsis speciosa</i>       | 37            | PYS          | <i>Malus honanensis</i>                        | 14            | MAH              |
| <i>Gollania ruginosa</i>           | 32            | GOR          | <i>Prunus clarofolia</i>                       | 9             | PRC              |

|                                     |    |     |                              |   |     |
|-------------------------------------|----|-----|------------------------------|---|-----|
| <i>Mnium laevinerve</i>             | 27 | MNL | <i>Quercus variabilis</i>    | 9 | QUV |
| <i>Taxiphyllum taxirameum</i>       | 27 | TAT | <i>Tilia japonica</i>        | 9 | TIJ |
| <i>Pylaisiella polyantha</i>        | 19 | PYP | <i>Cornus controversa</i>    | 4 | COC |
| <i>Rhynchostegium pallenticaule</i> | 10 | RHP | <i>Viburnum betulifolium</i> | 4 | VIB |
| <i>Homalothecium sericeum</i>       | 10 | HOS | <i>Meliosma veitchiorum</i>  | 4 | MEV |
| <i>Trocholejeunea sandwicensis</i>  | 10 | TRS | <i>Pinus tabuliformis</i>    | 4 | PIT |
| <i>Trichostomum tenuirostre</i>     | 5  | TRT | <i>Carpinus cordata</i>      | 4 | CAC |
| <i>Brachythecium buchananii</i>     | 5  | BRB | <i>Styrax obassis</i>        | 2 | STO |
| <i>Plagiomnium cuspidatum</i>       | 5  | PLC | <i>Juglans cathayensis</i>   | 2 | JUC |
| <i>Entodon cladorrhizans</i>        | 5  | ENC | <i>Celastrus orbiculatus</i> | 2 | CEO |
| <i>Bryhnia brachycladula</i>        | 5  | BRB |                              |   |     |

**Table S3. Overview of topographic factor forest canopy light factors in the plot**

| Environmental Variables                 | Minimum | Maximum | Average Value |
|-----------------------------------------|---------|---------|---------------|
| Aspect                                  | 1.67    | 359.99  | 140.03        |
| Slope / (°)                             | 4.46    | 41.22   | 21.41         |
| Elevation / m                           | 1567.23 | 1591.73 | 1578.66       |
| Convexity / (°)                         | -13.94  | 14.38   | 0.54          |
| Total transmittance                     | 0.00    | 0.43    | 0.17          |
| Scattered radiation under the canopy    | 0.00    | 1221.00 | 522.23        |
| Total direct radiation under the canopy | 0.00    | 9932.00 | 3903.03       |
| Canopy coverage                         | 0.00    | 0.93    | 0.67          |
| Leaf area index                         | 0.00    | 4.72    | 1.87          |
| Average leaf angle / (°)                | 0.00    | 85.00   | 40.12         |

**Table S4. The PCA first four axis of light variables**

| Species                                        | PC1          | PC2          | PC3          | PC4          |
|------------------------------------------------|--------------|--------------|--------------|--------------|
| <i>Betula platyphylla</i>                      | -1.24860946  | -0.40700923  | 0.377190413  | -0.103298653 |
| <i>Symplocos paniculata</i>                    | -0.20582806  | 0.175660773  | 0.399638995  | -0.079859334 |
| <i>Bothrocaryum controversa</i>                | -1.933795701 | 1.201751103  | -0.837121652 | 0.13291892   |
| <i>Carpinus turczaninowii</i>                  | 0.397854926  | -0.262350113 | 0.089964451  | 0.099541461  |
| <i>Malus honanensis</i>                        | -1.148848021 | 0.021032998  | 0.275988201  | -0.189722749 |
| <i>Tilia japonica</i>                          | -0.121443617 | -1.650551348 | -0.008845774 | -0.33066045  |
| <i>Pinus armandii</i>                          | -0.833037734 | 0.227737586  | -0.205287598 | -0.003267104 |
| <i>Viburnum betulifolium</i>                   | -0.432688792 | 1.472842309  | 0.065829678  | 0.119204718  |
| <i>Celastrus orbiculatus</i>                   | 2.497622004  | -0.607257331 | -0.304863432 | -0.141318786 |
| <i>Meliosma veitchiorum</i>                    | 1.854539684  | 0.821518391  | 0.117504484  | -0.177774234 |
| <i>Toxicodendron vernicifluum</i>              | -1.423461893 | 0.656347812  | 0.678167817  | -0.032484508 |
| <i>Carpinus cordata</i>                        | 2.048987     | 0.903267604  | 0.080849927  | 0.034298098  |
| <i>Litsea tsinlingensis</i>                    | -2.60649859  | 0.179073675  | 0.552332037  | 0.195878974  |
| <i>Quercus aliena</i> var. <i>acutiserrata</i> | 0.381942903  | 0.326792607  | 0.354197807  | 0.013995267  |
| <i>Lindera obtusiloba</i>                      | 0.12102745   | 0.469639349  | 0.07285924   | 0.112114846  |

|                                             |              |              |              |              |
|---------------------------------------------|--------------|--------------|--------------|--------------|
| <i>Tilia paucicostata</i>                   | -1.220329677 | 0.820138451  | -0.39357275  | 0.121505844  |
| <i>Quercus variabilis</i>                   | 3.900701227  | -0.020270696 | 0.142513992  | 0.374439899  |
| <i>Sorbus alnifolia</i>                     | -1.369555715 | 0.538878933  | -0.151936871 | 0.006708404  |
| <i>Cornus kousa</i> subsp. <i>chinensis</i> | 0.963439403  | -1.409272555 | -0.417992381 | -0.204229802 |
| <i>Prunus clarofolia</i>                    | 2.35663776   | 0.987467909  | -0.51459137  | -0.057880394 |
| <i>Juglans cathayensis</i>                  | -0.54594124  | -5.239420765 | -0.143841911 | 0.234762835  |
| <i>Pinus tabuliformis</i>                   | -0.995872177 | -0.544503623 | 0.216203186  | -0.055486054 |
| <i>Styrax obassis</i>                       | 3.969643673  | 0.634264276  | 0.030686663  | -0.033697926 |
| <i>Corylus heterophylla</i>                 | -4.406485352 | 0.704221884  | -0.475873152 | -0.035689272 |

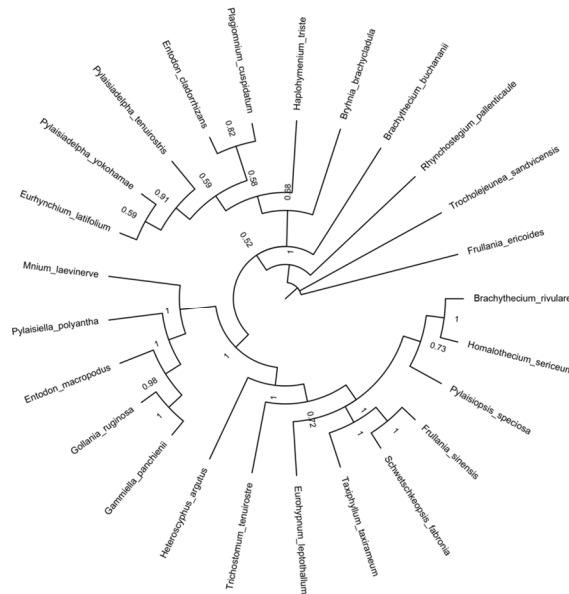

**Figure S1. Tree epiphytic bryophyte phylogenetic tree**

**Table S5. The light variables**

| TT          | SRUC        | TDRUC       | CC          | LAI         | ALA         |
|-------------|-------------|-------------|-------------|-------------|-------------|
| 0.200061505 | 595.2798641 | 4225.283231 | 0.657796715 | 1.686582555 | 38.77343692 |
| 0.184068887 | 547.0492055 | 3785.895261 | 0.687306306 | 1.739324967 | 37.61232343 |
| 0.209906544 | 575.5587505 | 4858.644534 | 0.700393778 | 1.573442318 | 26.08015132 |
| 0.169105187 | 511.8283138 | 3852.25633  | 0.679808881 | 1.853067079 | 39.46919736 |
| 0.201032358 | 590.4559835 | 4172.138021 | 0.673790414 | 1.692941724 | 36.52524942 |
| 0.181654065 | 553.8517126 | 4310.345668 | 0.644033167 | 1.986960671 | 46.34244445 |
| 0.192419347 | 557.4646077 | 4316.133021 | 0.683142985 | 1.733967448 | 34.38030535 |
| 0.187652127 | 539.25388   | 3807.069458 | 0.717688788 | 1.646699636 | 28.65761301 |
| 0.136262604 | 426.0438401 | 3483.272326 | 0.704954225 | 2.181221033 | 44.1189955  |
| 0.158641683 | 457.8389626 | 3141.715658 | 0.73020905  | 2.034584279 | 35.38221377 |
| 0.209618139 | 604.5337353 | 3882.044948 | 0.677556185 | 1.604314841 | 32.31260337 |
| 0.14690777  | 441.8750791 | 3120.335016 | 0.733712159 | 1.972178209 | 35.67496481 |
| 0.225404486 | 640.2373974 | 4412.984552 | 0.645306879 | 1.488498532 | 32.33304573 |

|             |             |             |             |             |             |
|-------------|-------------|-------------|-------------|-------------|-------------|
| 0.175641094 | 520.9648529 | 3576.184199 | 0.69354506  | 1.829589913 | 36.40843065 |
| 0.178288253 | 521.1479352 | 3793.823772 | 0.694096604 | 1.809463319 | 34.26886534 |
| 0.196540257 | 561.3192014 | 4451.644566 | 0.695148019 | 1.630570798 | 30.32014848 |
| 0.114075379 | 360.5539098 | 2628.647375 | 0.715822208 | 2.26545625  | 41.18017328 |
| 0.200965945 | 579.6358566 | 4404.159799 | 0.685479008 | 1.634743068 | 32.2275038  |
| 0.158339495 | 490.4571386 | 4191.729967 | 0.668136232 | 2.06227229  | 46.51921688 |
| 0.139895828 | 418.8134626 | 3365.754532 | 0.748564517 | 2.052763124 | 34.86567802 |
| 0.172785571 | 551.3075625 | 5177.301768 | 0.525873581 | 2.12192478  | 63.6148991  |
| 0.194082824 | 578.4976993 | 4269.295714 | 0.657897659 | 1.724438724 | 39.61212395 |
| 0.116727578 | 363.7084168 | 2588.76647  | 0.751066241 | 2.225298799 | 39.93011992 |
| 0.253133983 | 701.3742906 | 5497.046798 | 0.65433348  | 1.362635657 | 25.28532697 |

**Table S6. The bark physicochemical properties variables**

| N     | P    | K    | C      | Si    | S     | pH   | CD   |
|-------|------|------|--------|-------|-------|------|------|
| 5.35  | 0.36 | 0.66 | 535.81 | 6.7   | 3.13  | 8.19 | 0.31 |
| 9.54  | 1.58 | 2.22 | 401.28 | 27.64 | 10.23 | 8.16 | 0.57 |
| 8.01  | 0.65 | 1.17 | 416.52 | 14.89 | 0.88  | 8.26 | 0    |
| 6.21  | 0.35 | 1.96 | 393.21 | 4.47  | 0.6   | 8.05 | 0    |
| 8.29  | 0.43 | 1.62 | 448.96 | 13.62 | 0.39  | 8.17 | 0.75 |
| 11.42 | 0.69 | 1.37 | 522.32 | 25.92 | 0.41  | 8.1  | 1.33 |
| 4.7   | 0.45 | 1.12 | 500.13 | 6.7   | 0.21  | 8.17 | 1.37 |
| 5.72  | 0.31 | 0.79 | 488.01 | 18.14 | 0.5   | 8.29 | 0    |
| 7.1   | 0.5  | 2.17 | 471.54 | 11.74 | 1.23  | 8.31 | 3    |
| 7.69  | 0.61 | 4.99 | 412.16 | 40.25 | 1.14  | 8.26 | 3    |
| 8.26  | 0.64 | 2.39 | 481.32 | 16    | 0.53  | 8.11 | 2.32 |
| 9.53  | 0.56 | 1.5  | 494.06 | 15    | 1.07  | 8.18 | 1.5  |
| 10.64 | 1.22 | 2.09 | 436.47 | 14.5  | 11.15 | 8.11 | 1.18 |
| 6.46  | 0.64 | 2.52 | 443.97 | 6.65  | 2.02  | 8.26 | 3.84 |
| 7.38  | 0.59 | 1.67 | 493.42 | 5.55  | 3.07  | 8.17 | 0.64 |
| 6.86  | 0.62 | 3.41 | 427.68 | 24.32 | 3.14  | 8.18 | 0    |
| 5.71  | 0.32 | 1.62 | 502.78 | 16.28 | 2.48  | 8.12 | 5.67 |
| 4.19  | 0.37 | 1.92 | 435.55 | 8.35  | 1.27  | 8.14 | 0.25 |
| 7.4   | 0.5  | 1.47 | 389.53 | 14.03 | 0.84  | 8.04 | 2.2  |
| 12.59 | 0.76 | 1.82 | 538.06 | 21.11 | 0.78  | 8.05 | 0    |
| 5.21  | 0.32 | 0.48 | 484.29 | 17.83 | 0.35  | 8.35 | 5    |
| 3.84  | 0.22 | 0.54 | 482.17 | 19.73 | 0.38  | 8.36 | 4.5  |
| 10.51 | 1.07 | 2.32 | 447.95 | 16.01 | 1.44  | 8.21 | 0    |
| 6.01  | 0.41 | 1.59 | 431.23 | 23.6  | 2.23  | 8.19 | 2.21 |

**Table S7 List of functional data**

|                              | capsule<br>length/<br>mm | spore<br>diameter/<br>um | spore<br>thickness<br>/um | middle<br>cell<br>length/<br>um | middle<br>cell<br>width<br>/um | stem<br>length<br>/mm | leaf<br>area/mm <sup>2</sup> | leaf<br>length-<br>to-width<br>ratio |
|------------------------------|--------------------------|--------------------------|---------------------------|---------------------------------|--------------------------------|-----------------------|------------------------------|--------------------------------------|
| <i>Haplohymenium</i>         | 1.4966666                | 33.9733333               | 1                         | 14.356666                       | 11.23666                       | 46.973333             | 3.263333333                  | 2.4160401                            |
| <i>triste</i> (Ces.) Kindb.  | 67                       | 3                        |                           | 67                              | 667                            | 33                    |                              |                                      |
| <i>Trichostomum</i>          | 30.513333                | 14.3333333               | 0.8                       | 8.4433333                       | 7.376666                       | 13.96                 | 0.293333333                  | 4.18446602                           |
| <i>tenuirostre</i> Lindb     | 33                       | 3                        |                           | 33                              | 667                            |                       |                              |                                      |
| <i>Rhynchostegium</i>        |                          |                          |                           |                                 |                                |                       |                              |                                      |
| <i>pallenticaule</i> Müll.   | 19.67                    | 9.44333333               | 1                         | 164.33333                       | 7.75                           | 51.303333             | 0.216666667                  | 2.29533678                           |
| Hal.                         |                          | 3                        |                           | 33                              |                                | 33                    |                              |                                      |
| <i>Pylaisiadelph</i>         |                          |                          |                           |                                 |                                |                       |                              |                                      |
| <i>yokohamae</i> (Broth.)    | 15.046666                | 13                       | 1                         | 37.303333                       | 4.543333                       | 26.34                 | 0.096666667                  | 3.26865672                           |
| Buck.                        | 67                       |                          |                           | 33                              | 333                            |                       |                              |                                      |
| <i>Bryhnia</i>               |                          |                          |                           |                                 |                                |                       |                              |                                      |
| <i>brachycladula</i>         | 49.654                   | 14                       | 1                         | 52.233333                       | 3.1                            | 49.622                | 3.533                        | 7.50346446                           |
| Cardot                       |                          |                          |                           |                                 |                                |                       |                              |                                      |
| <i>Brachythecium</i>         | 2.7866666                | 15.5866666               | 0.8                       | 73.22                           | 9.333333                       | 42.89                 | 0.436666667                  | 4.61157025                           |
| <i>buchananii</i> Jaeger     | 7                        | 7                        |                           |                                 | 333                            |                       |                              |                                      |
| <i>Plagiomnium</i>           | 25.436666                | 22.27                    | 1                         | 43.8                            | 28.16666                       | 24.763333             | 3.246666667                  | 2.54271356                           |
| <i>cuspidatum</i> T. Kop.    | 67                       |                          |                           |                                 | 667                            | 33                    |                              |                                      |
| <i>Pylaisia polyantha</i>    | 7.9233333                | 15.4766666               | 0.9                       | 31.766666                       | 5                              | 35.833333             | 0.243333333                  | 2.82203390                           |
| (Hedw.) Schimp.              | 33                       | 7                        |                           | 67                              |                                | 33                    |                              |                                      |
| <i>Entodon</i>               |                          |                          |                           |                                 |                                |                       |                              |                                      |
| <i>cladorrhizans</i>         | 14.713333                | 15.9833333               | 0.8                       | 49.526666                       | 3.826666                       | 36.786666             | 0.646666667                  | 2.36787564                           |
| (Hedwig) Müller              | 33                       | 3                        |                           | 67                              | 667                            | 67                    |                              |                                      |
| Hal.                         |                          |                          |                           |                                 |                                |                       |                              |                                      |
| <i>Eurhynchium</i>           |                          | 19.9333333               | 0.8                       | 38.293333                       | 3.933333                       | 37.406666             | 3.756666667                  | 4.16566264                           |
| <i>latifolium</i> Cardot     | 13                       | 3                        |                           | 33                              | 333                            | 67                    |                              |                                      |
| <i>Taxiphyllum</i>           |                          |                          |                           |                                 |                                |                       |                              |                                      |
| <i>taxirameum</i> (Mitt.)    | 8.54                     | 12.6549                  | 0.80952381                | 42.633                          | 4.3                            | 36.7                  | 2.88                         | 1.125                                |
| M. Fleisch.                  |                          |                          |                           |                                 |                                |                       |                              |                                      |
| <i>Eurohypnum</i>            |                          |                          |                           |                                 |                                |                       |                              |                                      |
| <i>leptothallum</i> (Müll.   | 15.56                    | 16.5533333               | 0.8                       | 49.97                           | 3.67                           | 10.833333             | 0.1                          | 5.46938776                           |
| Hal.) Ando                   |                          | 3                        |                           |                                 |                                | 33                    |                              |                                      |
| <i>Trocholejeunea</i>        |                          |                          |                           |                                 |                                |                       |                              |                                      |
| <i>sandvicensis</i> (Gott.)  | 0                        | 8.41333333               | 0                         | 30                              | 27                             | 45.4                  | 0.56                         | 1                                    |
| Mizut.                       |                          | 3                        |                           |                                 |                                |                       |                              |                                      |
| <i>Schwetschkeopsis</i>      |                          |                          |                           |                                 |                                |                       |                              |                                      |
| <i>fabronia</i>              | 7.2                      | 16.672                   | 0.80952381                | 23                              | 5.1                            | 26.3                  | 0.77                         | 0.36                                 |
| (Schwaegr.) Broth.           |                          |                          |                           |                                 |                                |                       |                              |                                      |
| <i>Pylaisiopsis speciosa</i> |                          | 15.4766666               | 0.9                       | 31.766666                       | 5                              | 35.833333             | 0.243333333                  | 2.82203390                           |
| (Mitt.) Broth.               | 6.833333                 | 7                        |                           | 67                              |                                | 33                    |                              |                                      |

|                                                 |                 |                 |            |                 |                 |                 |             |                 |
|-------------------------------------------------|-----------------|-----------------|------------|-----------------|-----------------|-----------------|-------------|-----------------|
| <i>Gammiella</i>                                |                 | 18.5333333      |            |                 | 3.623333        |                 |             |                 |
| <i>panchienii</i> Tan et Jia                    | 29.74           | 3               | 0.8        | 57.48           | 333             | 32.11           | 0.3         | 4.09375         |
| <i>Mnium laevinerve</i>                         | 12.893333       | 13.9033333      |            | 39.366666       | 5.426666        |                 |             | 3.31578947      |
| Cardot.                                         | 33              | 3               | 0.9        | 67              | 667             | 14.82           | 0.086666667 | 4               |
| <i>Heteroscyphus</i>                            |                 |                 |            |                 |                 |                 |             |                 |
| <i>argutus</i> (Reinw. et al.) Schiffn.         | 20              | 17.4780952<br>4 | 0.80952381 | 20              | 11              | 22              | 0.4         | 8.57142857<br>1 |
| <i>Homalothecium</i>                            |                 |                 |            |                 |                 |                 |             |                 |
| <i>sericeum</i> (Hedw.)                         | 13.6            | 14.1            | 1          | 33.686666       | 5.486666        | 29.56           | 0.366666667 | 2.58273381      |
| Bruch, Schimp. & W.Guembel                      |                 |                 |            | 67              | 667             |                 |             | 6               |
| <i>Pylaisiadelpha</i>                           |                 |                 |            |                 |                 |                 |             |                 |
| <i>tenuirostris</i> (Bruch et Schimp. ex Sull.) | 18.27           | 13.4866666<br>7 | 0.8        | 57.436666<br>67 | 3.626666<br>667 | 22.816666<br>67 | 0.22        | 5.43859648<br>9 |
| Buck                                            |                 |                 |            |                 |                 |                 |             |                 |
| <i>Brachythecium</i>                            | 17.4            | 14.6366666<br>7 | 0.8        | 52.486666<br>67 | 9.386666<br>667 | 63.9            | 0.253333333 | 1.58219178<br>1 |
| <i>rivulare</i> Schimp.                         |                 |                 |            |                 |                 |                 |             |                 |
| <i>Entodon</i>                                  |                 |                 |            |                 |                 |                 |             |                 |
| <i>macropodus</i> (Hedw.)                       | 5.9333333<br>33 | 16.6            | 1          | 57.43           | 5.2             | 92.776666<br>67 | 0.283333333 | 10.1803278<br>9 |
| Müll. Hal.                                      |                 |                 |            |                 |                 |                 |             |                 |
| <i>Frullania sinensis</i>                       | 0               | 43.6            | 0          | 23.633333<br>33 | 14.33666<br>667 | 15.64           | 0.223333333 | 6.81690139<br>7 |
| Steph.                                          |                 |                 |            |                 |                 |                 |             |                 |
| <i>Gollania ruginosa</i>                        | 45.116666       | 17.7366666<br>7 | 0.9        | 56.436666<br>67 | 3.99            | 47.733333<br>33 | 0.753333333 | 2.69230769      |
| (Mitt.) Broth.                                  | 67              |                 |            |                 |                 |                 |             |                 |
| <i>Frullania ericoides</i>                      | 30.513333       | 14.3333333      | 0.8        | 8.4433333<br>33 | 7.376666<br>667 | 13.96           | 0.293333333 | 4.18446602<br>4 |
| (Nees) Nees & Mont.                             | 33              | 3               |            |                 |                 |                 |             |                 |
